# Supplementary material
Source: publisher figshare collection journal article supplement (https://frontiersin.figshare.com/ndownloader/files/33959540)
Supplement: Supplementary file 1 [file 33959540]

Table S1. Field collected and rared chub mackerel samples (n = 46) used to establish a lens radius – fork length relationship.
